# Supplementary material
Source: Springer Nature journal article supplement (https://www.springermedizin.de/resource/supplementary/12943_2014_1298_MOESM5_ESM.pdf/9553226)
Supplement: MOESM5 [file 9553226]

# Fig. S5

|              |             |      |                                                                    |      |
|--------------|-------------|------|--------------------------------------------------------------------|------|
| <b>Human</b> | NM_001101.3 | 1198 | CGCAAATGCTTC <u>TAG</u> GCGGACTATGACTTAGTTGCG--TTACACCCTTTC        | 1245 |
|              |             |      | .                     .   .     .   .                              |      |
| <b>Mouse</b> | NM_007393.3 | 1193 | CGCAAGTGCTTC <u>TAG</u> GCGGACTGTTACTGAGCTGCGTTTTACACCCTTTC        | 1242 |
|              | NM_001101.3 | 1246 | --TTGACAAAACCTAACTTGCGCAGAAAAACA-----AGATGAGATT                    | 1284 |
|              |             |      | .                                                                  |      |
|              | NM_007393.3 | 1243 | TTTGACAAAACCTAACTTGCGCAGAAAAAAAATAAGAGACAACATT                     | 1292 |
|              | NM_001101.3 | 1285 | GGCATGGC <u>TTTATTT</u> ----- <u>GTTTTTTTTGTTTTGTT</u>             | 1316 |
|              |             |      | .                                                                  |      |
|              | NM_007393.3 | 1293 | GGCATGGC <u>TTTGTTTTTTTTAAATTTTTTTTTAAAGTTTTTTTTTTTTTTTT</u>       | 1342 |
|              | NM_001101.3 | 1317 | <u>TT</u> ----- <u>GGTTTTTTTTTTTTTTTT</u> GGC----TTGACTCAGG        | 1349 |
|              |             |      | .                                                                  |      |
|              | NM_007393.3 | 1343 | <u>TTTTTTTTTTTTTTAAAGTTTTTTTGTTTTGT</u> GGCGCTTTTGGACTCAGG         | 1392 |
|              | NM_001101.3 | 1350 | ATTTAAAAACTGGAACGGTGAAGGTGACAGCAGTCGGTTGGAGCGGAGCAT                | 1399 |
|              |             |      | .                                                                  |      |
|              | NM_007393.3 | 1393 | ATTTAAAAACTGGAACGGTGAAGGCGACAGCAGTTGGTTGGAGCAAACAT                 | 1442 |
|              | NM_001101.3 | 1400 | CCCCCAAAGTTC-AC-AATGTGGCCGAGGACTTTGATTGCACA <u>TTGT</u> ---        | 1444 |
|              |             |      |                                                                    |      |
|              | NM_007393.3 | 1443 | CCCCCAAAGTTCTACAAATGTGGCTGAGGACT----TTGTACA <u>TTGTTTT</u>         | 1488 |
|              | NM_001101.3 | 1445 | ----- <u>TGTTTTTTTAATAGTCATTCCAAAT</u> --                          | 1469 |
|              |             |      | .                                                                  |      |
|              | NM_007393.3 | 1489 | <u>GTTTTTTTTTTTTTTTTGGTTTTGTCTTTTTTTAATAGTCATTCCAAGT</u> AT        | 1538 |
|              | NM_001101.3 | 1470 | --ATGAGATGCGTTGTTACAGGAAGTCCCTTGCCATCCTAAAAGCCA-CC                 | 1516 |
|              |             |      | .     .     .                                                      |      |
|              | NM_007393.3 | 1539 | CCATGAAATAAGTGGTTACAGGAAGTCCCTCACCTCCCAAAGCCACCC                   | 1588 |
|              | NM_001101.3 | 1517 | CCACTTCTCTCTA--AGGAGAATGGCCCAGTCC-TCTCCCAAGTCCACAC                 | 1563 |
|              |             |      | .                                                                  |      |
|              | NM_007393.3 | 1589 | CCACT----CCTAAGAGGAGGATGGTCGCGTCCATGCCCTGAGTCCACCC                 | 1634 |
|              | NM_001101.3 | 1564 | AGGGG-AGGTGATAGCATTGCTTTCGTGTAAATTATGTAATGCAAAA-- <u>T</u>         | 1610 |
|              |             |      | .                                                                  |      |
|              | NM_007393.3 | 1635 | CGGGGAAGGTGACAGCATTGCTTCTGTGTAAATTATGTAATGCAAAAAT <u>T</u>         | 1684 |
|              | NM_001101.3 | 1611 | <u>TTTTTTAATCTT-CGCCTTAATACTTTTTTATTTTGT</u> TTT-- <u>ATTT-TGA</u> | 1656 |
|              |             |      |                                                                    |      |
|              | NM_007393.3 | 1685 | <u>TTTTTAAATCTTCCGCCTTAATACTTCAT--TTTTGTTTTTAATTTCT</u> GTA        | 1732 |
|              | NM_001101.3 | 1657 | ATGATGAGCC----TTCGTGCCCCCTTCCCCCTTTTTTGT-CCCCAA                    | 1701 |
|              |             |      | .   .   .   .                                                      |      |
|              | NM_007393.3 | 1733 | ATG----GCCCAGGTCTGAGGCCTCCCTT-----TTTTTTGTCCCCCAA                  | 1773 |
|              | NM_001101.3 | 1702 | CTTGAGATGTATGAAGGCTTTTGGTCTCCCTGGGAGTGG-----GTG                    | 1743 |
|              |             |      |                                                                    |      |
|              | NM_007393.3 | 1774 | CTT--GATGTATGAAGGC-TTTGGTCTCCCTGGGAGGGGGTTGAGGTGTT                 | 1820 |
|              | NM_001101.3 | 1744 | GAGGCAGCCAGGGCTTACCTGTACACTGACTTGAGACCAGTTG <u>AATAAAA</u>         | 1793 |
|              |             |      |                                                                    |      |
|              | NM_007393.3 | 1821 | GAGGCAGCCAGGGCTGGCCTGTACACTGACTTGAGACC----- <u>AATAAAA</u>         | 1865 |
|              | NM_001101.3 | 1794 | GTGCACACCTTA-----AAAATGA                                           | 1812 |
|              |             |      |                                                                    |      |
|              | NM_007393.3 | 1866 | GTGCACACCTTACCTTACACAAAC---                                        | 1889 |
